# Supplementary material for: Novel Regulatory Roles of Wnt1 in Infection-Associated Colorectal Cancer
Source: PubMed Central journal article supplement — Neoplasia. 2018 Apr 5;20(5):499–509. doi: 10.1016/j.neo.2018.03.001 (PMC5915993; doi:10.1016/j.neo.2018.03.001), 2018-04-05

**Figure S1: Overexpression of Wnt1 expression in intestinal epithelial cells alters the inflammatory response.**

(A) Wnt1 overexpressed in HCT116 cells through transfection pCDNA3-Wnt1 plasmid.

(B) IL-8, IL-6 and GM-CSF mRNA levels in Wnt1-overexpression HCT116 cells after *Salmonella* colonization. The data are presented as the mean  $\pm$  SD of 3 replicate experiments.

**Figure S2 Wnt1 expression level modulated the expression of Wnt11 and Wnt2 in HCT116 cells**

(A) The mRNA level of Wnt2 and Wnt1 displayed up-regulation when knockdown of Wnt1.

(B) The mRNA level of Wnt2 displayed down-regulation when overexpressed of Wnt1

**Figure S3. Wnt1 and  $\beta$ -catenin localization in colon.**

Wnt1 and  $\beta$ -catenin localization in tumor tissue of AOM/DSS-induced colon cancer with or without *Salmonella* infection

Figure S1

A

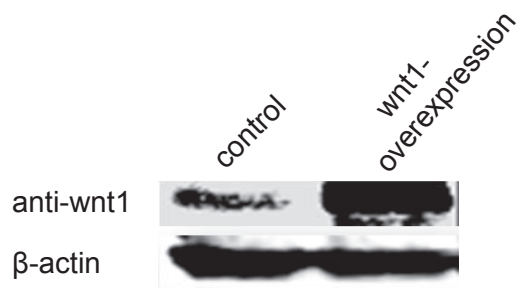

B

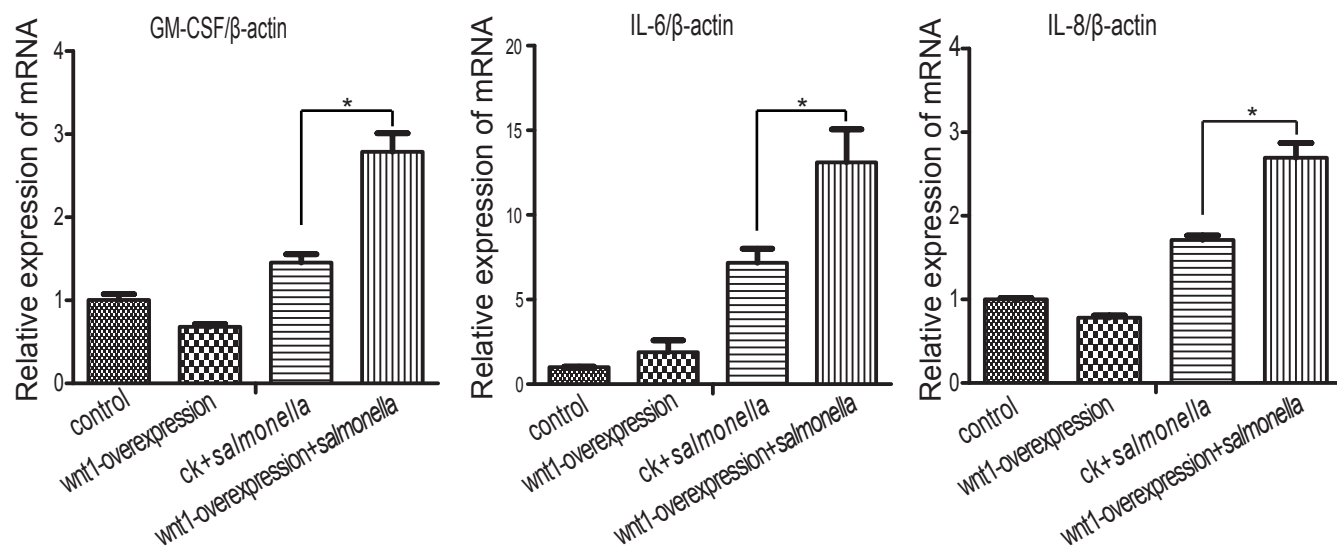

Figure S2

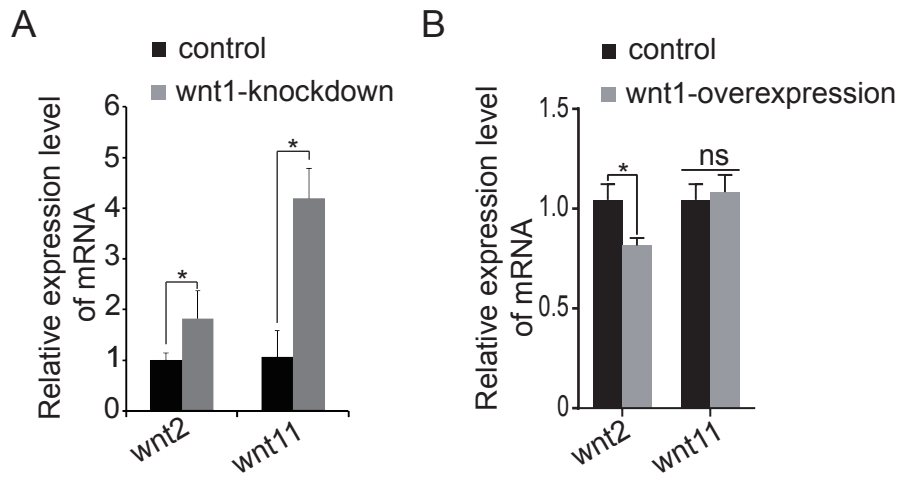

Fig.S3

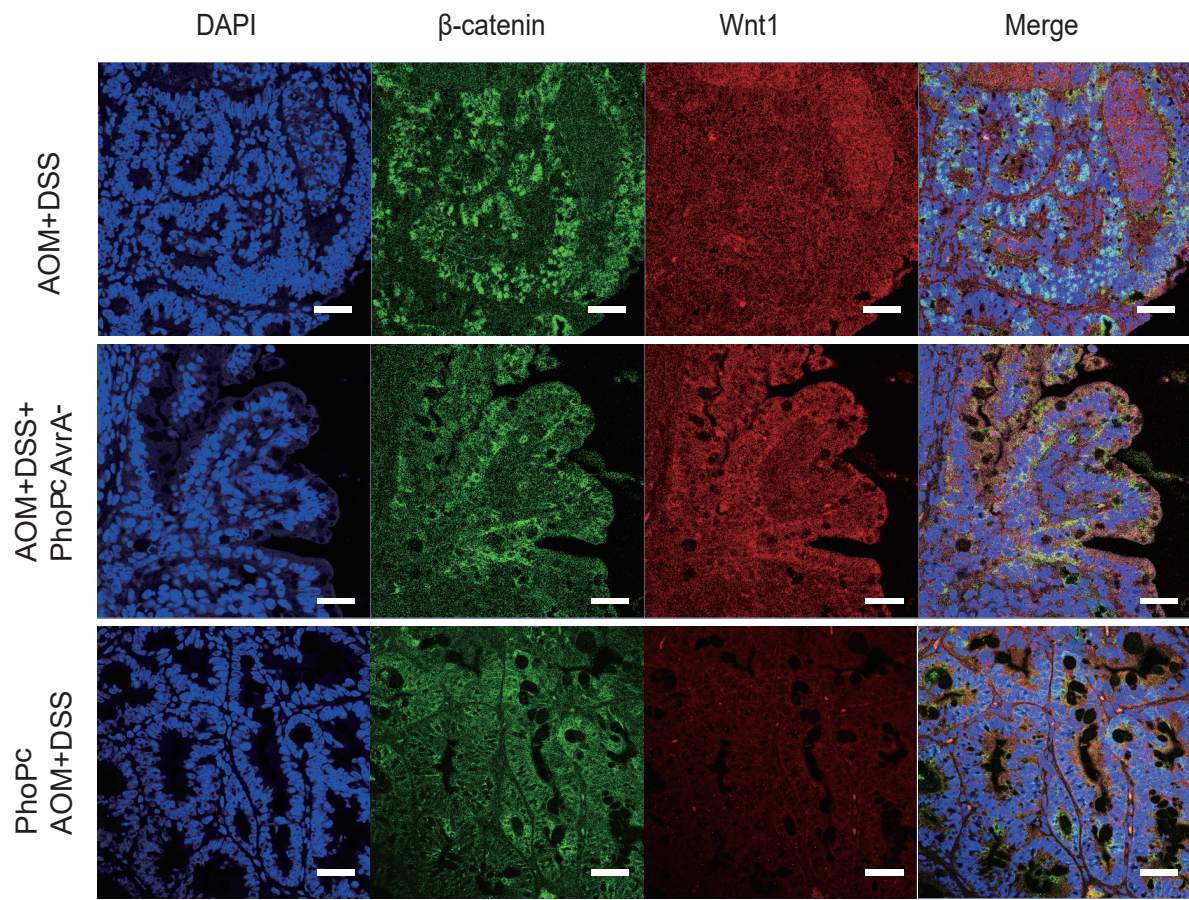

Supplement: mmc1.pdf [file mmc1.pdf]
